# Supplementary material for: The efficacy of integrated hepatitis C virus treatment in relieving fatigue in people who inject drugs: A randomized controlled trial
Source: Research Square preprint supplement (doi:10.21203/rs.3.rs-1872716/v1), 2022-08-03
Supplement: Supplementary file 2 [file bd92a44a6497e9a5015f9dc1.docx]

# **Additional File 9**

|  | **Effect estimates** | |
| --- | --- | --- |
|  | **Coefficient (95 % CI)** | ***p*-value** |
| Time trend | –1.0 (–3.9;1.9) | 0.504 |
| Δ*FSS-9 sum score from baseline to EOT12* | | |
| Standard HCV treatment | 0.0 (ref.) | - |
| Integrated HCV treatment | –2.5 (–5.8;0.7) | 0.121 |
