# Supplementary material for: The efficacy of integrated hepatitis C virus treatment in relieving fatigue in people who inject drugs: A randomized controlled trial
Source: Research Square preprint supplement (doi:10.21203/rs.3.rs-1872716/v1), 2022-08-03
Supplement: Supplementary file 3 [file dbeafcb8242099ddc2c7c492.docx]

# **Additional File 3**
